# Supplementary material
Source: MDPI journal article supplement (https://www.mdpi.com/2297-8739/9/12/431)

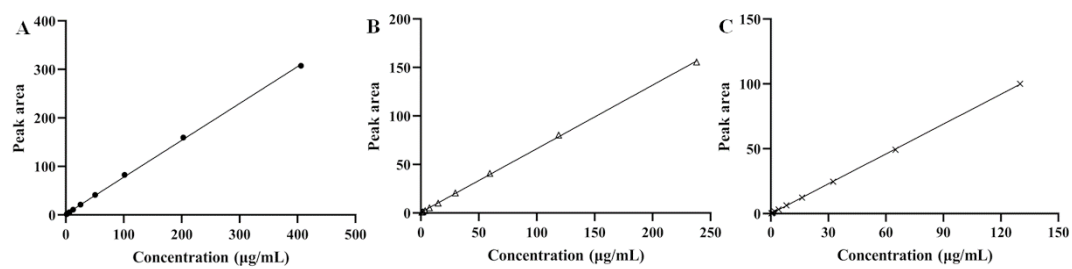

**Figure S1.** The standard curves of AST (A), ISO (B) and ENG (C).

Supplement: s1 [file s1 › separations-2058376-supplementary.pdf]
